# Supplementary material
Source: publisher figshare collection journal article supplement (https://frontiersin.figshare.com/ndownloader/files/31653512)
Supplement: Supplementary file 1 [file 31653512]

**Supplementary table 1: List of collected variables during the survey**

| **Variables** | **Type** | |
| --- | --- | --- |
| **Qualitative** | **Quantitative** |
| **Socio-demographic variables** |  |  |
| District | x |  |
| Province | x |  |
| Age of farmer* |  | x |
| Gender | x |  |
| Marital status | x |  |
| Education level | x |  |
| Farmers' category | x |  |
| **Economic variables** |  |  |
| Size of the Land (hectare) |  | x |
| Capital per season (RWF)  Yield (Kg/hectare) |  | x |
| Estimate of the benefit from cassava per hectare (RWF) | | x |
| **Agronomic variables** |  |  |
| Type of cassava varieties grown | x |  |
| Source of cassava cuttings | x |  |
| Distance to the source* |  | x |
| Proximity to the tarmac road* |  | x |
| Proximity to RAB* |  | x |
| Proximity to the border* |  | x |
| Availability of enough improved cuttings | x |  |
| Trust of quality | x |  |
| Farming system | x |  |
| Using fertilizers for cassava | x |  |
| Access to extension services | x |  |
| Extension services benefited by farmers | x |  |
| Cassava production constraints | x |  |
| **Disease awareness variables** |  |  |
| Knowledge of cassava viral diseases | x |  |
| Knowledge of viral diseases transmission | x |  |
| Knowledge of viral diseases symptoms | x |  |
| Observed diseases and pests in the field by the farmer | x |  |
| Knowledge of viral diseases management | x |  |
| Methods of viral diseases management known | x |  |
| **Variables marked with* were grouped into categories prior to the analysis** | | |
